# Supplementary material for: Water-dispersed CsPbBr3 nanocrystals for single molecule localization microscopy with high location accuracy for targeted bioimaging
Source: Royal Society of Chemistry journal article supplement (doi:10.1039/d1nr08029f), 2022-01-01
Supplement: d1nr08029f1.pdf [file d1nr08029f1.pdf]

## Supporting Information

### **1. The quasi-equilibrium times and duty cycle of CsPbBr<sub>3</sub> NCs and CsPbBr<sub>3</sub>@Biotin probes**

To determine the time that the nanocrystals need to reach the quasi-equilibrium between on and off states, CsPbBr<sub>3</sub> NCs were attached onto the bottom of an eight chambered Nunc™ Lab-Tek™ II Chamber Slide™ and excited by a 488 nm laser. Then, 30000 frames of fluorescent images were collected. The exposure time was set to be 20 ms per frame. Time-dependent fluorescence intensity profiles of CsPbBr<sub>3</sub> NCs were obtained by analyzing the 30000 frames of fluorescent images. Finally, we used 1500 frames as a group to monitor the changes in the on-off duty cycle as a function of imaging time. The result was shown in Figure S1. As we can see, more than 500 s was necessary to reach the quasi-equilibrium between on and off states. The average duty cycle of CsPbBr<sub>3</sub> NCs measured between 500–600 s is 0.0497.

Similarly, the time that CsPbBr<sub>3</sub>@Biotin needed to reach the quasi-equilibrium state was determined in the same way, which is about 400 s (Figure S8). The average duty cycle of CsPbBr<sub>3</sub>@Biotin measured between 400–500 s is 0.0245.

### **2. The localization precision of CsPbBr<sub>3</sub> NCs, CdSSe/ZnS QDs, ZnCdSe/ZnS QDs and CsPbBr<sub>3</sub>@Biotin probes**

The localization precision is determined by the following equation:  $\Delta x = \sqrt{\frac{s^2 + \frac{a^2}{12}}{N} + \frac{8\pi s^4 b^2}{a^2 N^2}}$ , where  $\Delta x$  is the localization precision;  $s$  is the standard deviation of PSF, which is related to the numerical aperture (NA) of the objective,  $a$  is the pixel size,  $N$  is the number of collected photons, and  $b$  is the background noise per pixel. To calculate the localization precision, CsPbBr<sub>3</sub> NCs were attached onto the bottom of an eight chambered Nunc™ Lab-Tek™ II Chamber Slide™ and excited by a 488 nm laser. Then, 10000 frames of fluorescent images with an imaging size of 12.8×12.8 μm were collected by a 100× (NA = 1.46) oil immersion objective and recorded by an Andor EM-CCD camera (iXon DU897). The exposure time was set to be 20 ms per

frame. The localization precision is calculated according to the above equation using the Zeiss Zen 2012 software.

The localization precision of CdSSe/ZnS QDs, ZnCdSe/ZnS QDs and CsPbBr<sub>3</sub>@Biotin probes were calculated in the same way.

### 3. Measurement of photoluminescence quantum yield (PL QY)

To calculate the PL QY of CsPbBr<sub>3</sub> NCs, 2,7-dichlorofluorescein (F-27) was used as the reference dye. As we know, the QY of F-27 is 87% under 465 nm excitation. Thus, the absorbance of both CsPbBr<sub>3</sub> NCs and F-27 at 465 nm was recorded by an absorption spectrometer. Then, the PL spectra of CsPbBr<sub>3</sub> NCs and F-27 were measured by using 465 nm excitation. After the integral area of PL spectra were calculated, the QY of CsPbBr<sub>3</sub> NCs was obtained by the following classical equation (1):

$$Q = Q_R \cdot \frac{I}{I_R} \cdot \frac{OD_R}{OD} \cdot \frac{n^2}{n_R^2} \quad (1)$$

where  $Q$  is QY,  $I$  is the integral area of PL spectra,  $OD$  is optical density at the excitation wavelength and  $n$  is the refractive index of the solvent. “R” in lower case stands for the reference dye. The data of three independent measurements were shown in Table S1. The solvent of F-27 is 0.1 M NaOH ( $n_R=1.335$ ), and the solvent of CsPbBr<sub>3</sub> NCs is water ( $n=1.333$ ). As a result, the PL QY of CsPbBr<sub>3</sub> NCs were 70.4%.

Table S1. The absorbance and PL integral area of CsPbBr<sub>3</sub> NCs and F-27.

| F-27                  |                         | CsPbBr <sub>3</sub> NCs |                       |
|-----------------------|-------------------------|-------------------------|-----------------------|
| Absorbance ( $OD_R$ ) | Integral area ( $I_R$ ) | Absorbance ( $OD$ )     | Integral area ( $I$ ) |
| 0.0099                | 17647.32                | 0.0125                  | 17867.25              |
| 0.0204                | 24160.65                | 0.0207                  | 19658.41              |
| 0.0306                | 32335.98                | 0.0322                  | 28263.52              |

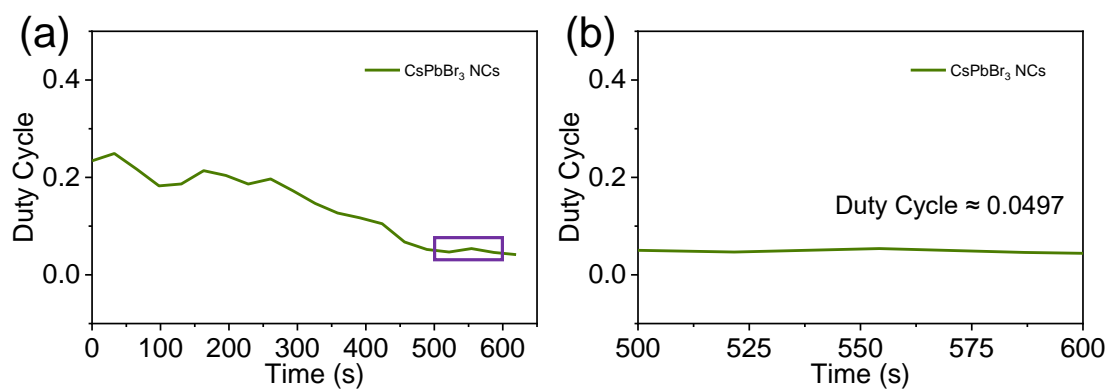

**Figure S1.** (a) The on-off duty cycle values of CsPbBr<sub>3</sub> NCs plotted versus time. (b) Enlarged region as indicated by the purple box in (a).

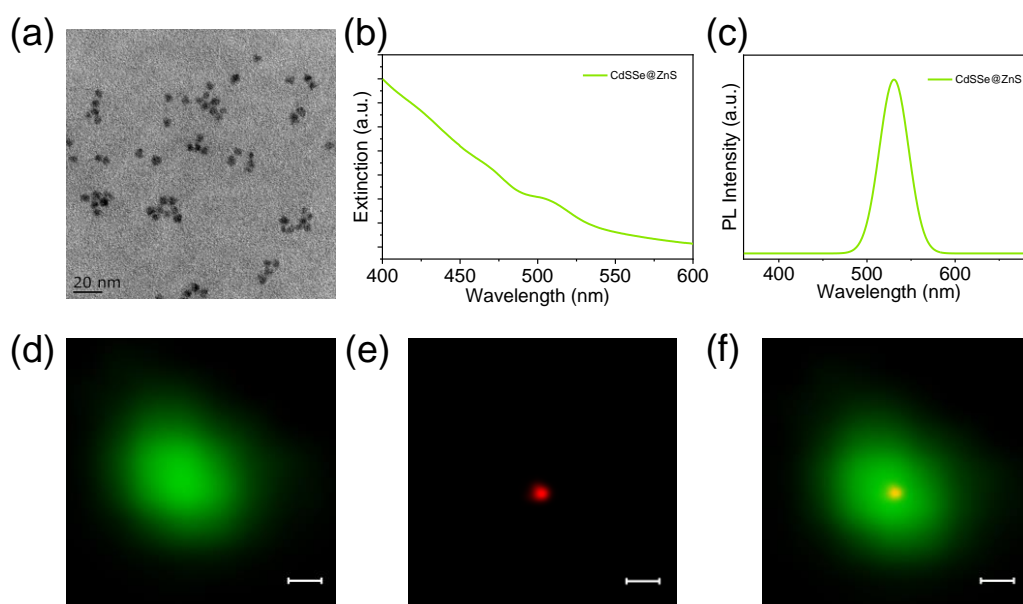

**Figure S2.** Characterization of CdSSe@ZnS QDs. (a) TEM images of CdSSe@ZnS QDs. The scale bar is 20 nm. (b) Absorption and (c) emission spectra of CdSSe@ZnS QDs. (d-e) Single-particle luminescence microscopic images of CdSSe@ZnS QDs: (d) wide field image (green), (e) SMLM image (red), (f) merged image of (d) and (e). The scale bar is 100 nm.

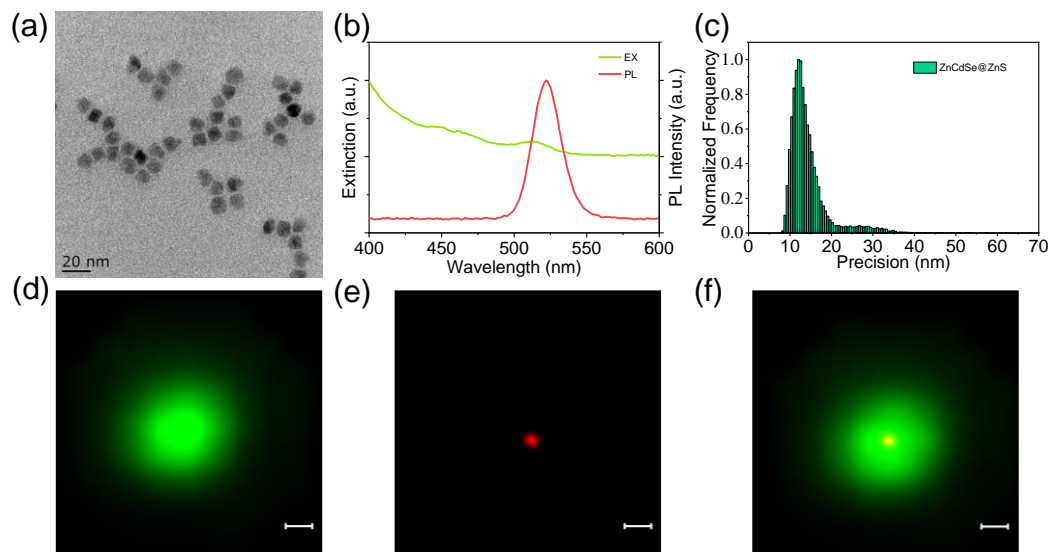

**Figure S3.** Characterization of ZnCdSe@ZnS QDs. (a) TEM images of ZnCdSe@ZnS QDs. The scale bar is 20 nm. (b) Absorption and emission spectra of ZnCdSe@ZnS QDs. (c) Localization precision of ZnCdSe@ZnS. The excitation light was 488 nm. (d-f) Single-particle luminescence microscopic images of ZnCdSe@ZnS QDs: (d) wide field image (green), (e) SMLM image (red), and (f) merged image of (d) and (e). The scale bar is 100 nm.

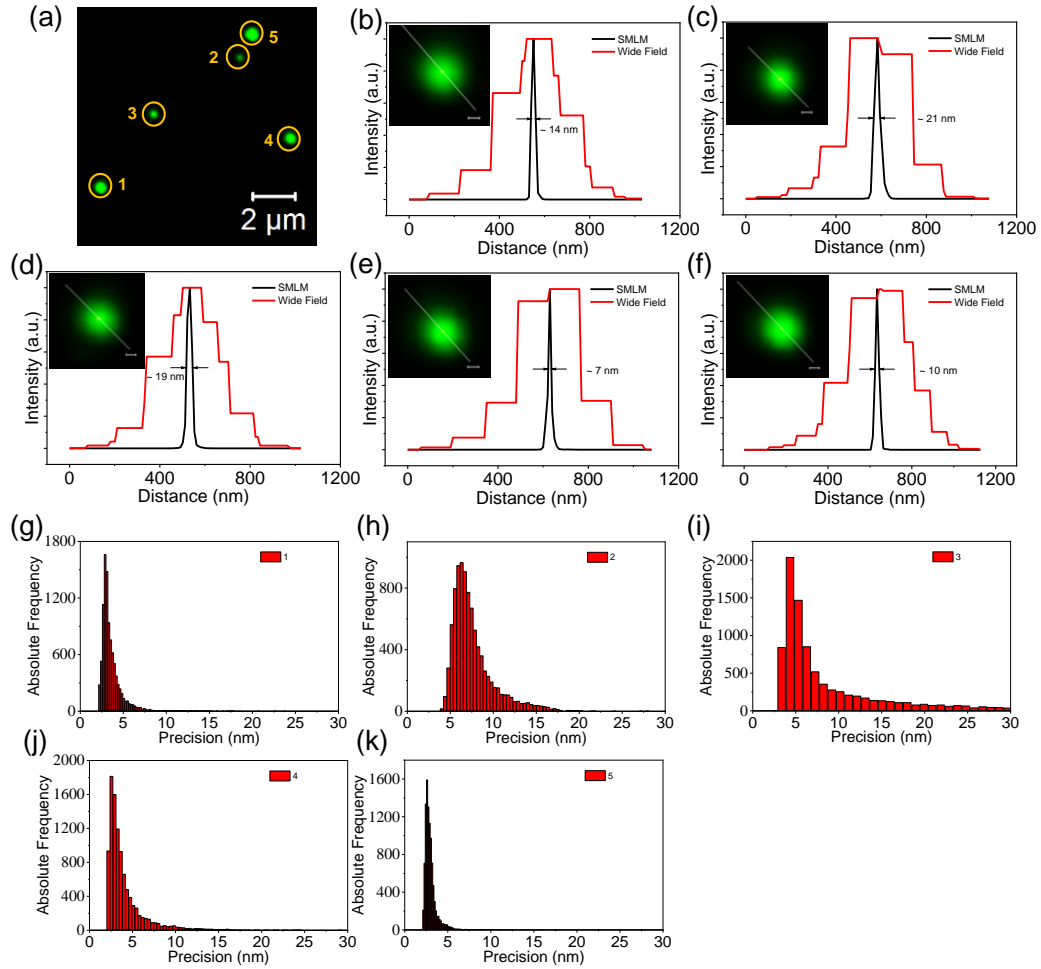

**Figure S4.** (a) The merged image of wide field and SMLM images. (b-f) The cross-sectional profiles along the white lines in the inset images (inset: the enlarge images of dots 1 - 5 in (a). (b) dot 1, (c) dot 2, (d) dot 3, (e) dot 4, and (f) dot 5. All scale bars are 100 nm.). (g-k) Localization precision of (g) dot 1, (h) dot 2, (i) dot 3, (j) dot 4, and (k) dot 5.

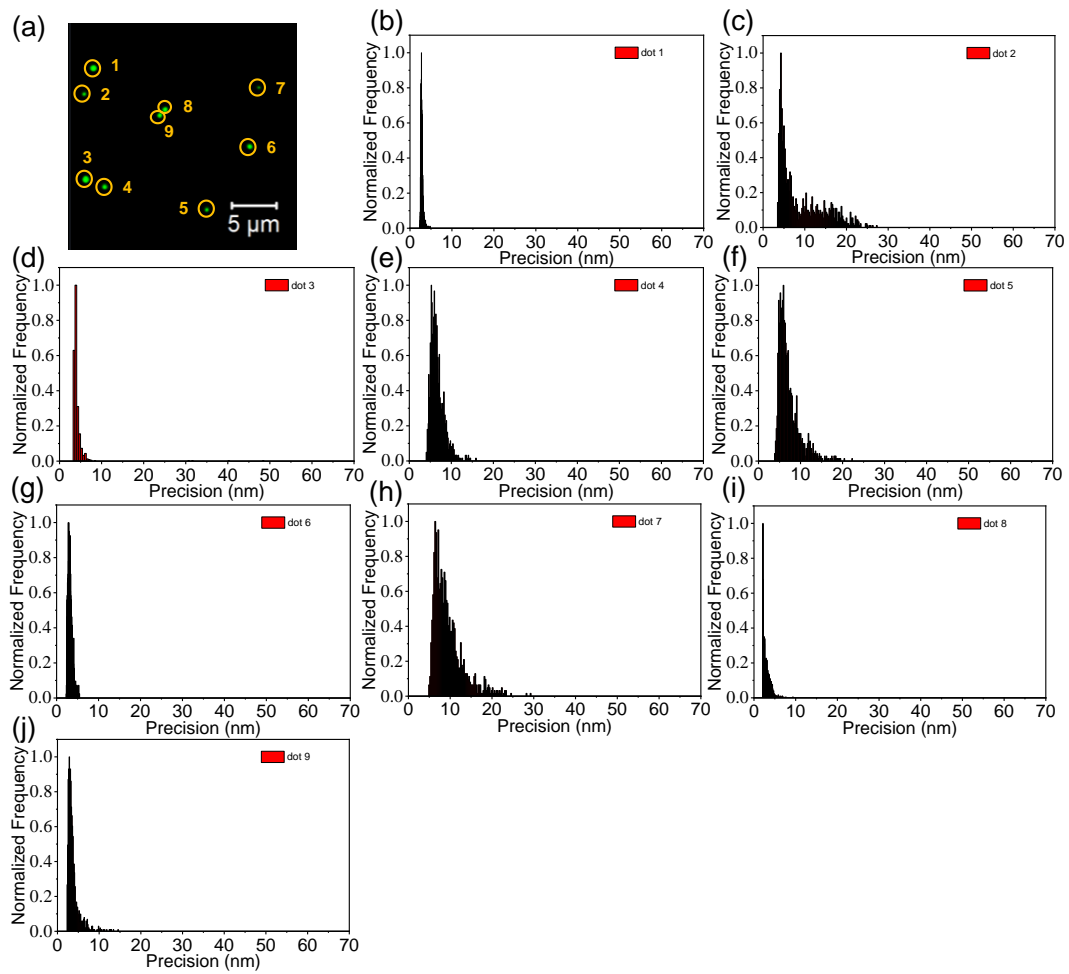

**Figure S5.** (a) The merged image of wide field and SMLM images. (b-j) Localization precision of (b) dot 1, (c) dot 2, (d) dot 3, (e) dot 4, (f) dot 5, (g) dot 6, (h) dot 7, (i) dot 8, and (j) dot 9.

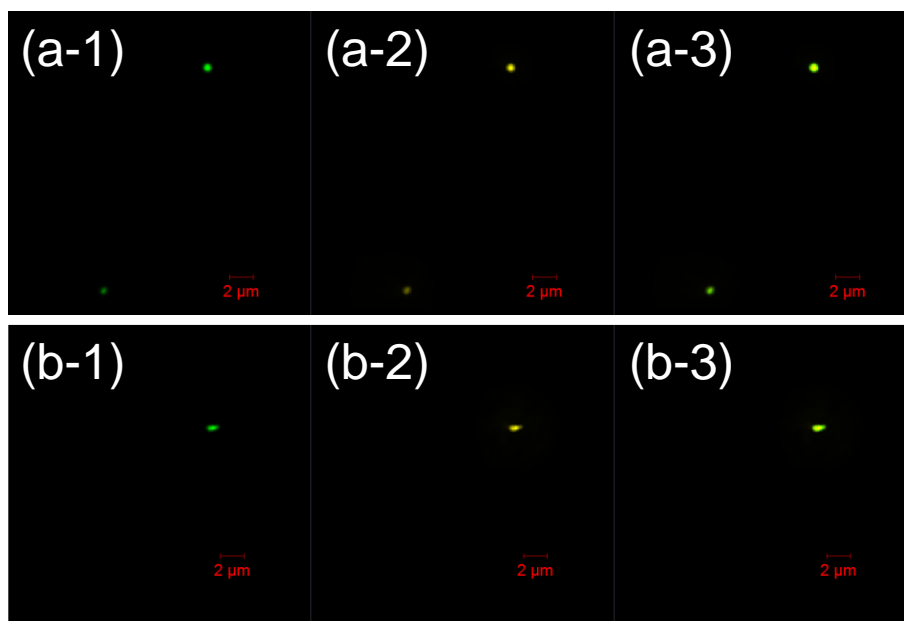

**Figure S6.** The co-localization results of exosomes labeled with CsPbBr<sub>3</sub> NCs and CM-DiI. (a, b-1) corresponding to Figure 4(c, e-1), respectively; (a, b-2) CM-DiI channel; (a, b-3) the merge channel.

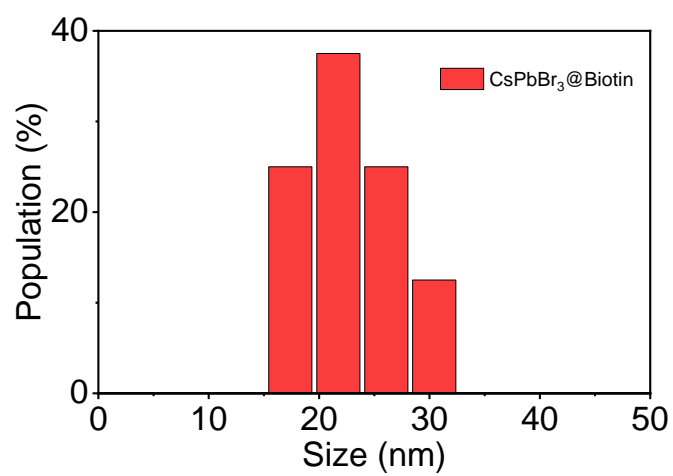

**Figure S7.** The size distribution of Figure 5b.

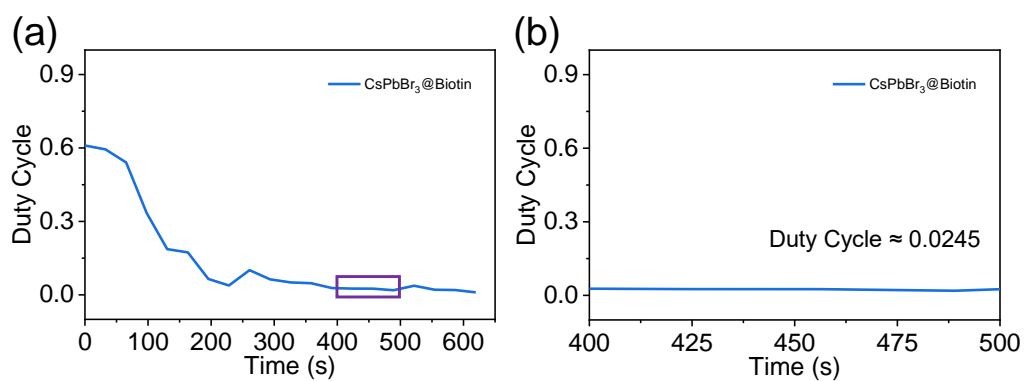

**Figure S8.** (a) The on-off duty cycle values of CsPbBr<sub>3</sub>@Biotin plotted versus time. (b) Enlarged region as indicated by the purple box in (a).

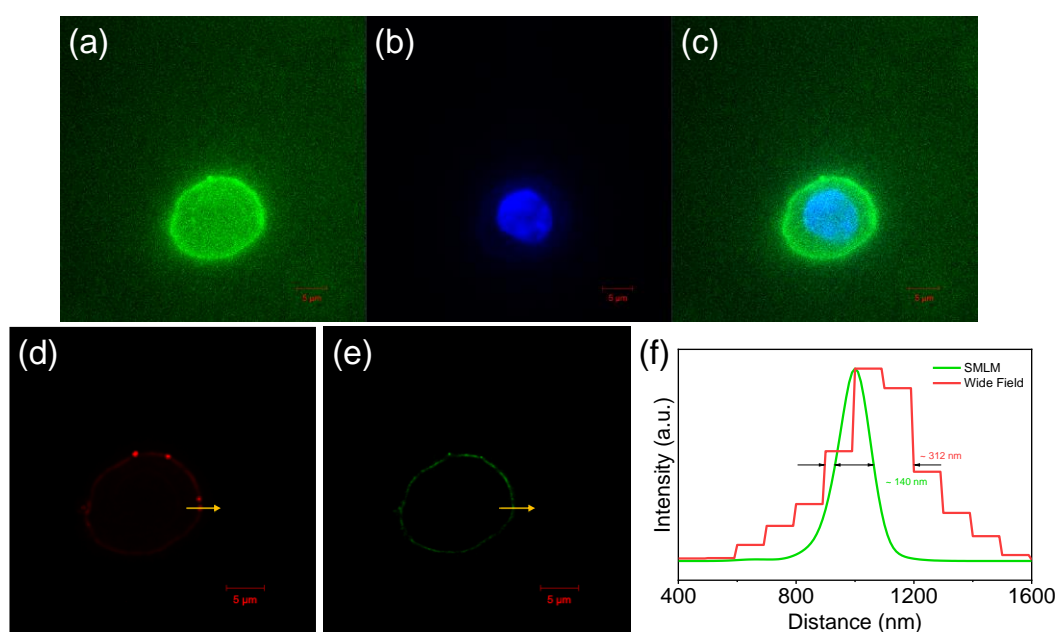

**Figure S9.** Cell membrane of SKBR3 cells labeled with CsPbBr<sub>3</sub>@Biotin. The wide-field TIRF image of (a) cell membrane labeled with CsPbBr<sub>3</sub>@Biotin, (b) cell nucleus dyed in blue by DAPI and (c) the overlay of (a) and (b). (d) The reconstructed wide-field TIRF image of (a). (e) SMLM image of the same cell. (f) Cross-sectional profiles along the yellow arrows in (d, e). All scale bars are 5  $\mu\text{m}$ .



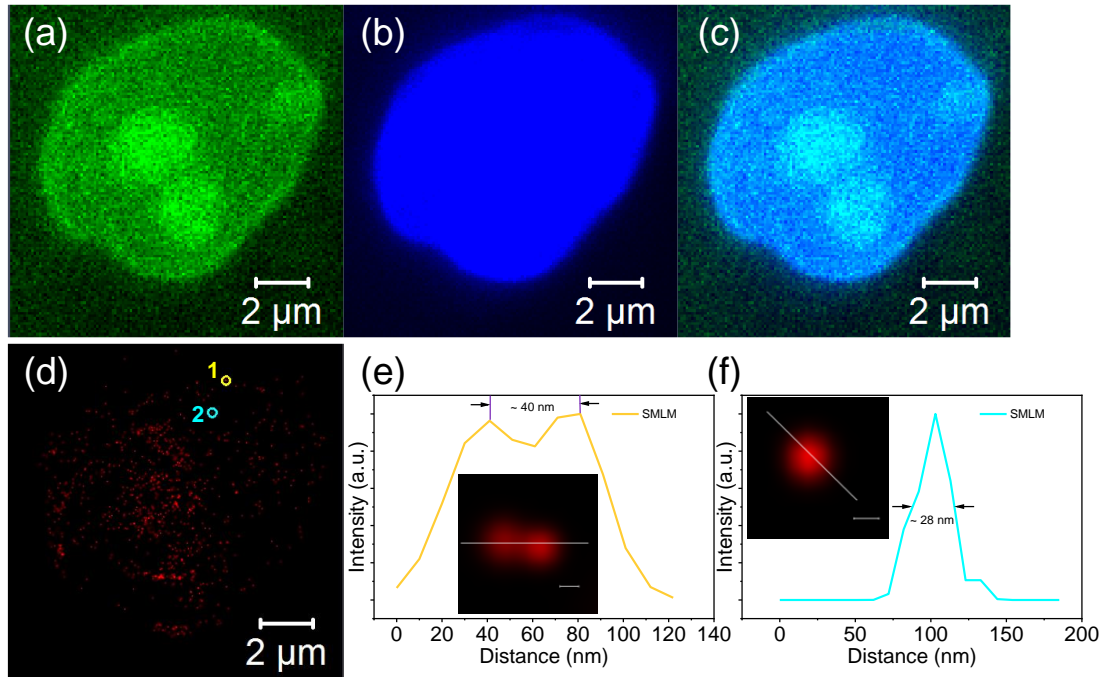

**Figure S10.** NPC channels of HeLa cells labeled with CsPbBr<sub>3</sub>@Biotin. The wide-field images of (a) the NPC channels labeled with CsPbBr<sub>3</sub>@Biotin, (b) cell nucleus stained by DAPI and (c) the overlay of (a) and (b). (d) SMLM image of the same cell. (e-f) The cross-sectional profiles along the white lines in the inset images (inset: the enlarged images of circles 1 and 2 in (d)). All scale bars are 20 nm).
